# Supplementary material for: A COP1-GATA2 axis suppresses AR signaling and prostate cancer
Source: PubMed Central journal article supplement — Proc Natl Acad Sci U S A. 2022 Oct 17;119(43):e2205350119. doi: 10.1073/pnas.2205350119 (PMC9618149; doi:10.1073/pnas.2205350119), 2022-10-17
Supplement: pnas.2205350119.sapp.pdf [file pnas.2205350119.sapp.pdf]

## Supplementary Materials

**Human GATA2 (NP\_116027, 480aa) vs. *A. thaliana* GATA2 (O49741, 264aa)**

```

NP_116027      MEVAPEQPRWMAHPAVLNAQHPDSHHPGLAHNYMEPAQLLPPDEVDFVFNHLD SQGNPYY 60
O49741         -----MDVYGLS----- 7
                  *      *

NP_116027      ANPAHARARVSYSPA HARLTGGQMC RPHLLHSPGLPWL DGGKAALSAAAHHHN PWTVSP 120
O49741         -----SPDLLRIDDL-----LD 19
                  * . * * . *

NP_116027      FSKTPLHP SAAGPGG PLSVYPGAGGGSGGGSSVASLTPTAAHSGSHLFGFPPTPPKE 180
O49741         FSNED-----IFSAS--SSGGSTAATSS-----SSFPPQNP S 50
** :                : : . * * . : : : : * * * .

NP_116027      --VSPDPSTTGAASPASSSAGGSAARGEDKDGK VQVSLTE-SMKMESGSP LRPGLATMG 237
O49741         FHHHLLPSSADHHS----FLHDICVPSDDAAHLEWLSQFVDDSFADFPANPLGGTMTSVK 106
                  * * : . *      . . . * * : : : * : : * * : : :

NP_116027      T-----QPATHHPIPTYSYV PAAAH D-----YSSGLFHP-----GGFLGGPASSF 278
O49741         TETSFP GKPRSKRSR APAPFAGTWSMPLESEHQQLHSAAKFKPKKEQSGGGGGGGG--R 164
*      . : : * * : : * . .      * : . * * * * * * * * *

NP_116027      TPQRSKARSCSEGRECVNCGATATPLWR RDGTG-HYLCNACGLYHKMNGQN--RPLIK 334
O49741         HQSSSSETTEGGGMRRCTHCASEKTPQWR TGPLPKTLCNACGVRFKSGRLVPEYRPASS 224
. . * : : . . * . * : : * * * * . * : * * * * * : * . * * .

NP_116027      PKRRLSAARRAGTCCANCQT TTTTLWRRN-ANGDPVCNACGLYK LHNVNRPLTMKKEGI 393
O49741         PTFVLTQHS-----NSHRKVMELR RQKEVMRQPQQVQL----- 257
* . * :                * : . . * * : : . : *

NP_116027      QTRNRKMSNKSKSKKGAECFEELSKCMQEKSSPFSAAALAGHMAPVGHLP PFSHSGHIL 453
O49741         -----HHHHHPF----- 264
                  : : . *

NP_116027      PTPPTPIHPSSLSFGHPH PSMVTAMG 480
O49741         ----- 264

```

**Supplementary Figure S1. Sequence alignments of human vs. *Arabidopsis thaliana* GATA2 protein.** Highlighted in cyan are the cysteine residues making up the Zinc Fingers. *Arabidopsis thaliana* GATA2 only carries on Zin Finger. Highlighted in Yellow are the BR1 and BR2 motifs in human GATA2 and the potential BR motifs in *Arabidopsis thaliana* GATA2.

Human COP1 (NP\_071902, 731aa) vs. *A. thaliana* COP1 (P43254, 675aa)

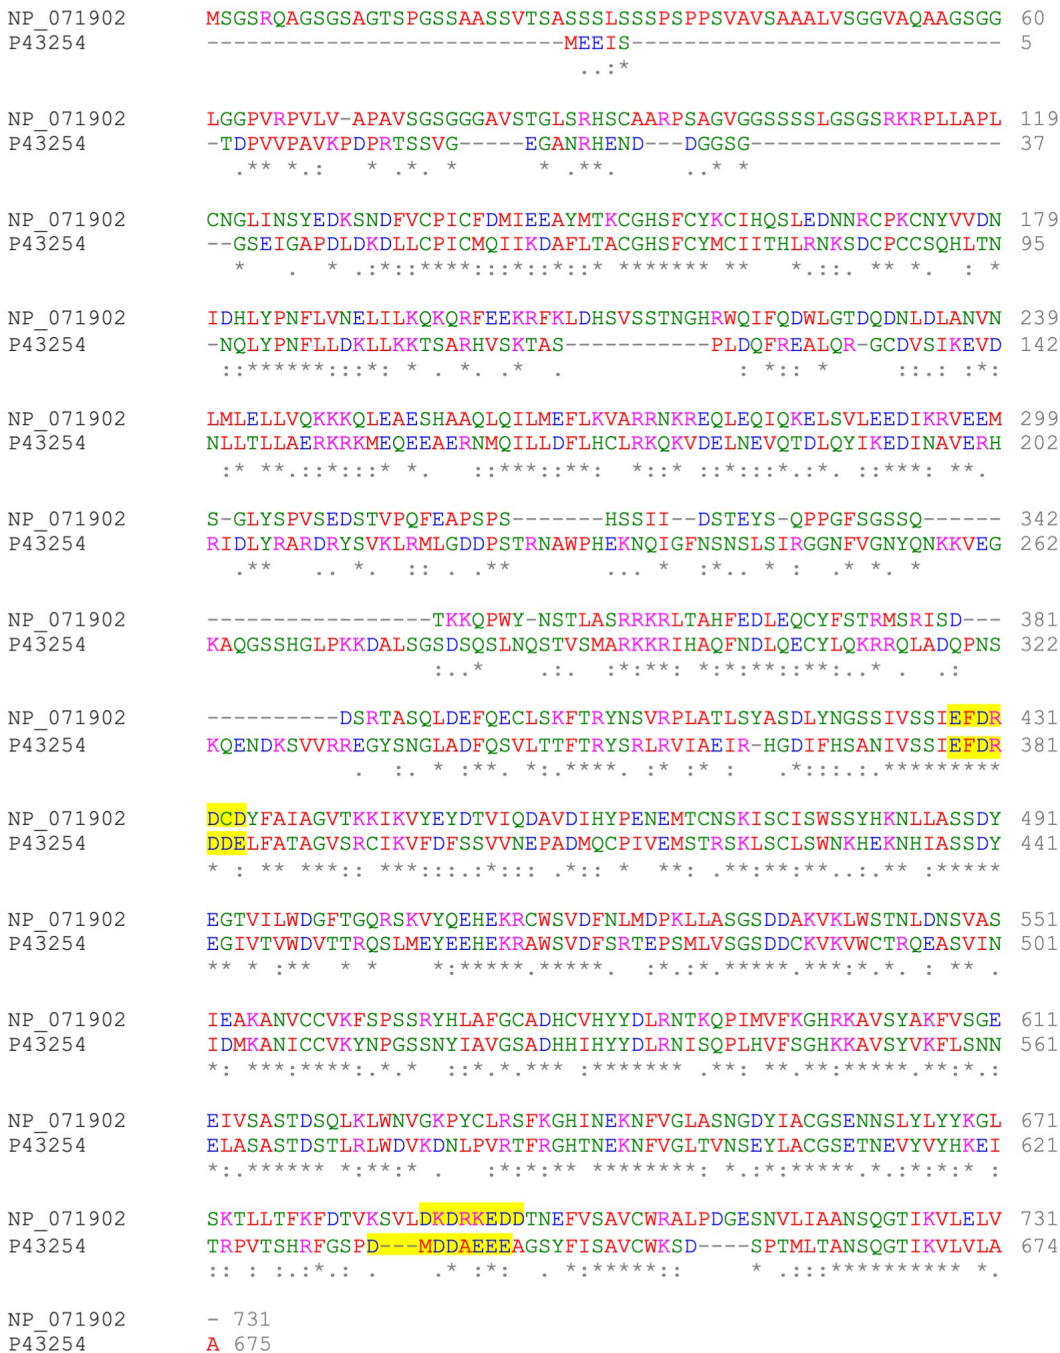

Supplementary Figure S2. Sequence alignments of human vs. *Arabidopsis thaliana* COP1 protein. Highlighted in Yellow are the D/E1 and D/E2 motifs in human GATA2 and the potential D/E motifs in *Arabidopsis thaliana* GATA2.

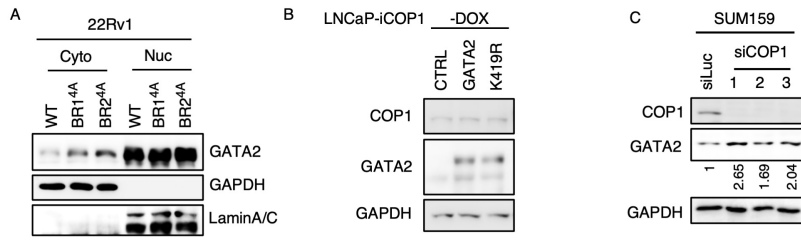

**Supplementary Figure S3. a** 22Rv1 cells were transfected with Myc-tagged wild type (WT) vs. BR1<sup>4A</sup> vs. BR2<sup>4A</sup>-mutated GATA2. 48 hours later, the cells were subjected to the cytoplasm or nuclear fractionation and Western blots. **b** Western blots on LNCaP-iCOP1 cells in the absence of DOX induction. **c** Western blots on COP1-knockdown SUM159 cells using three different COP1 siRNAs (siCOP1, #1-3) vs. control siRNA against luciferase (siLuc).

Alignment of GATA2 protein sequence across species

|         |                                                                                           |     |
|---------|-------------------------------------------------------------------------------------------|-----|
| Human   | MEVAPEQPRWMAHPAVLNAQHPDSSHHPGLAHNYMEPAQLLPDEVVFFNHLDSQGNPYANPAHARARVSYSPA HARLT           | 80  |
| Gorilla | MEVAPEQPRWMAHPAVLNAQHPDSSHHPGLAHNYMEPAQLLPDEVVFFNHLDSQGNPYANPAHARARVSYSPA HARLT           | 80  |
| Pig     | MEVAPEQPRWMAHPAVLNAQHPDSSHHPGLAHNYMEPAQLLPDEVVFFNHLDSQGNPYANPAHARARVSYSPA HARLT           | 80  |
| Rat     | MEVAPEQPRWMAHPAVLNAQHPDSSHHPGLAHNYMEPAQLLPDEVVFFNHLDSQGNPYANPAHARARVSYSPA HARLT           | 80  |
| Mouse   | MEVAPEQPRWMAHPAVLNAQHPDSSHHPGLAHNYMEPAQLLPDEVVFFNHLDSQGNPYANPAHARARVSYSPA HARLT           | 80  |
| Human   | GGQMC RP HLLHSPGLPWLDGGKAALSAAAAHHHNPWTVPFSKTP LHPSAAGGPGGPLSVYPGAGGGSGGSGSSVASLT         | 160 |
| Gorilla | GGQMC RP HLLHSPGLPWLDGGKAALSAAAAHHHNPWTVPFSKTP LHPSAAGGPGGPLSVYPGAGGGSGGSGSSVASLT         | 160 |
| Pig     | GGQMC RP HLLHSPGLPWLDGGKAALSAAAAHHHNPWTVPFSKTP LHPSAAGGPGGPLSVYPGAGGGSGGSGSSVASLT         | 160 |
| Rat     | GGQMC RP HLLHSPGLPWLDGGKAALSAAAAHHHNPWTVPFSKTP LHPSAAGGPGGPLSVYPGAGGGSGGSGSSVASLT         | 160 |
| Mouse   | GGQMC RP HLLHSPGLPWLDGGKAALSAAAAHHHNPWTVPFSKTP LHPSAAGGPGGPLSVYPGAGGGSGGSGSSVASLT         | 160 |
| Human   | PTAAHSGSHLFGFPPTPPKEVSPDPSTTGAASPASSSAGGSAARGEDKDGVKYQVSLTESMKMESGSP LRPGLATMGTQP         | 240 |
| Gorilla | PTAAHSGSHLFGFPPTPPKEVSPDPSTTGAASPASSSAGGSAARGEDKDGVKYQVSLTESMKMESGSP LRPGLAAMGTQP         | 240 |
| Pig     | PTAAHSGSHLFGFPPTPPKEVSPDPSTTGAASPASSSAGGSAARGEDKDGVKYQVSLTESMKMESGSP LRPGLAAMGTQP         | 240 |
| Rat     | PTAAHSGSHLFGFPPTPPKEVSPDPSTTGAASPASSSAGGSAARGEDKDGVKYQVSLTESMKMESGSP LRPGLAAMGTQP         | 240 |
| Mouse   | PTAAHSGSHLFGFPPTPPKEVSPDPSTTGAASPASSSAGGSAARGEDKDGVKYQVSLTESMKMESGSP LRPGLAAMGTQP         | 240 |
| Human   | ATHHPIPTYPSYVPA AAHDYSSGLFHPGGFLGGPASSFTP <b>KQRSKAR</b> SCSEGRCVNCGATATPLWRRDGTGHYLCNACG | 320 |
| Gorilla | ATHHPIPTYPSYVPA AAHDYSSGLFHPGGFLGGPASSFTP <b>KQRSKAR</b> SCSEGRCVNCGATATPLWRRDGTGHYLCNACG | 320 |
| Pig     | ATHHPIPTYPSYVPA AAHDYSSGLFHPGGFLGGPASSFTP <b>KQRSKAR</b> SCSEGRCVNCGATATPLWRRDGTGHYLCNACG | 320 |
| Rat     | ATHHPIPTYPSYVPA AAHDYSSGLFHPGGFLGGPASSFTP <b>KQRSKAR</b> SCSEGRCVNCGATATPLWRRDGTGHYLCNACG | 320 |
| Mouse   | ATHHPIPTYPSYVPA AAHDYSSGLFHPGGFLGGPASSFTP <b>KQRSKAR</b> SCSEGRCVNCGATATPLWRRDGTGHYLCNACG | 320 |
| Human   | LYHKMNGQNRPLI <b>KPKRR</b> LSAARRAGTCCANCQTTTTLWRRNANGDPVCNACGLYYKLHNVNRPLTMKKEGIQTRNRKM  | 400 |
| Gorilla | LYHKMNGQNRPLI <b>KPKRR</b> LSAARRAGTCCANCQTTTTLWRRNANGDPVCNACGLYYKLHNVNRPLTMKKEGIQTRNRKM  | 400 |
| Pig     | LYHKMNGQNRPLI <b>KPKRR</b> LSAARRAGTCCANCQTTTTLWRRNANGDPVCNACGLYYKLHNVNRPLTMKKEGIQTRNRKM  | 400 |
| Rat     | LYHKMNGQNRPLI <b>KPKRR</b> LSAARRAGTCCANCQTTTTLWRRNANGDPVCNACGLYYKLHNVNRPLTMKKEGIQTRNRKM  | 400 |
| Mouse   | LYHKMNGQNRPLI <b>KPKRR</b> LSAARRAGTCCANCQTTTTLWRRNANGDPVCNACGLYYKLHNVNRPLTMKKEGIQTRNRKM  | 400 |
| Human   | SNKSKSKKGAECFEELSKCMQEKSSPFSAAALAGHMAPVGHLPFSSHGHILPTPTPIHPSSLSFGHPPSSMVTAMG              | 480 |
| Gorilla | SNKSKSKKGAECFEELSKCMQEKSSPFSAAALAGHMAPVGHLPFSSHGHILPTPTPIHPSSLSFGHPPSSMVTAMG              | 480 |
| Pig     | SNKSKKNGKGAECFEELSKCMQEKSSPFSAAALAGHMAPVGHLPFSSHGHILPTPTPIHPSSLSFGHPPSSMVTAMG             | 480 |
| Rat     | SSKSKSKKGAECFEELSKCMQEKSSPFSAAALAGHMAPVGHLPFSSHGHILPTPTPIHPSSLSFGHPPSSMVTAMG              | 480 |
| Mouse   | SSKSKSKKGAECFEELSKCMQEKSSPFSAAALAGHMAPVGHLPFSSHGHILPTPTPIHPSSLSFGHPPSSMVTAMG              | 480 |

Supplementary Figure S4. Alignment of GATA2 protein sequence across species.

Highlighted in Yellow are the BR1 and BR2 motifs.

Alignment of COP1 protein sequence across species

|         |                                                                                  |     |
|---------|----------------------------------------------------------------------------------|-----|
| Human   | MSGSRQAGSGSAGTSPGSSAASSVTSASSLSLSSPSPVAVSAAALVSGGVAQAAGSGGLGGPVRPVLVAPAVSGS--G   | 78  |
| Gorilla | MSGSRQAGSGSAGTSPGSSAASSVTSASSLSLSSPSPVAVSAAALVSGGVAQAAGSGGLGGPVRPVLVAPAVSGS--G   | 78  |
| Pig     | MSGSRQVGSAGTSPGSSAASSVTSASSLSLSSPSPVAVSAAALVSGGVAQAAGSGGLGGPVRPVLVAAAASVGS--A    | 78  |
| Rat     | MSGSRQAGSGSAGTSPGSSAASSVTSASSLSLSSPSPVAVSAAATLVSGGVAQAAGSGGLGGPVRPVLVAAAASVGSASA | 80  |
| Mouse   | MSGSRQAGSGSAGTSPGSSAASSVTSASSLSLSSPSPVAVSAAATLVSGGVAQAAGSGGLGGPVRPVLVAAAASVGSASA | 80  |
|         |                                                                                  |     |
| Human   | GGAVSTGLSRHSCAARPSAGVGGSSSLGSGSRKRPLLAAPLNCGLINSYEDKSNDFVCPICFDMIEEAYMTKCGHSFCYK | 158 |
| Gorilla | GGAVSTGLSRHSCAARPSAGVGGSSSLGSGSRKRPLLAAPLNCGLINSYEDKSNDFVCPICFDMIEEAYMTKCGHSFCYK | 158 |
| Pig     | -GAVSAGLSRLSCAARPSAGVGGSSSLGSGSRKRPLLAAPLNCGLINSYEDKSNDFVCPICFDMIEEAYMTKCGHSFCYK | 157 |
| Rat     | GGAVSAGLSRLSCAARPSAGVGGSSSLGSGSRKRPLLAAPLNCGLINSYEDKSNDFVCPICFDMIEEAYMTKCGHSFCYK | 160 |
| Mouse   | GGAVSAGQSRSLSCAARPSAGVGGSSSLGSGSRKRPLLVPLNCGLINSYEDKSNDFVCPICFDMIEEAYMTKCGHSFCYK | 160 |
|         |                                                                                  |     |
| Human   | CIHQSLLEDNNRCPKCNVVDNIDHLYPNFLVNELILKQKQRFEEKRFKLDHSVSTNGHRWQIFQDWLGTQDQNLDLANV  | 238 |
| Gorilla | CIHQSLLEDNNRCPKCNVVDNIDHLYPNFLVNELILKQKQRFEEKRFKLDHSVSTNGHRWQIFQDWLGTQDQNLDLANV  | 238 |
| Pig     | CIHQSLLEDNNRCPKCNVVDNIDHLYPNFLVNELILKQKQRFEEKRFKLDHSVSTNGHRWQIFQDQLLGTQDQNLDLANV | 237 |
| Rat     | CIHQSLLEDNNRCPKCNVVDNIDHLYPNFLVNELILKQKQRFEEKRFKLDHSVSTNGHRWQIFQDQLLGTQDQNLDLANV | 240 |
| Mouse   | CIHQSLLEDNNRCPKCNVVDNIDHLYPNFLVNELILKQKQRFEEKRFKLDHSVSTNGHRWQIFQDQLLGTQDQNLDLANV | 240 |
|         |                                                                                  |     |
| Human   | NLMLELLVQKKKQLEAESHAHQILMEFLKVARRNKREQLQIQKELSVLEEDIKRVEEMSGLYSPVSEDSTVPQFEAP    | 318 |
| Gorilla | NLMLELLVQKKKQLEAESHAHQILMEFLKVARRNKREQLQIQKELSVLEEDIKRVEEMSGLYSPVSEDSTVPQFEAP    | 318 |
| Pig     | NLMLELLVQKKKQLEAESHAHQILMEFLKVARRNKREQLQIQKELSVLEEDIKRVEEMSGLYSPVSEDSTVPQFEAP    | 317 |
| Rat     | NLMLELLVQKKKQLEAESHAHQILMEFLKVARRNKREQLQIQKELSVLEEDIKRVEEMSGLYSPVSEDSTVPQFEAP    | 320 |
| Mouse   | NLMLELLVQKKKQLEAESHAHQILMEFLKVARRNKREQLQIQKELSVLEEDIKRVEEMSGLYSPVSEDSTVPQFEAP    | 320 |
|         |                                                                                  |     |
| Human   | SPSHSSIIDSTEYSQPPGFGSGSQTKKQPWYNSTLASRRKRLTAHFEDLEQCYFSTRMSRISDDSRASQLDEFQCELSK  | 398 |
| Gorilla | SPSHSSIIDSTEYSQPPGFGSGSQTKKQPWYNSTLASRRKRLTAHFEDLEQCYFSTRMSRISDDSRASQLDEFQCELSK  | 398 |
| Pig     | SPSHSSIIDSTEYIQQPPGFGSGSQTKKQPWYNSTLASRRKRLTAHFEDLEQCYFSTRMSRISDDSRASQLDEFQCELSK | 397 |
| Rat     | SPSHSSIIDSTEYSQPPGFGSGSQTKKQPWYNSTLASRRKRLTAHFEDLEQCYFSTRMSRISDDSRASQLDEFQCELSK  | 400 |
| Mouse   | SPSHSSIIDSTEYSQPPGFGSGSQTKKQPWYNSTLASRRKRLTAHFEDLEQCYFSTRMSRISDDSRASQLDEFQCELSK  | 400 |
|         |                                                                                  |     |
| Human   | FTRYNSVRPLATLSYASDLYNGSSIVSIEFDRDCDYFAIAGVTKKIKVVEYDVTIQDAVDIHYPENEMTCNSKISCISW  | 378 |
| Gorilla | FTRYNSVRPLATLSYASDLYNGSSIVSIEFDRDCDYFAIAGVTKKIKVVEYDVTIQDAVDIHYPENEMTCNSKISCISW  | 378 |
| Pig     | FTRYNSVRPLATLSYASDLYNGSSIVSIEFDRDCDYFAIAGVTKKIKVVEYDVTIQDAVDIHYPENEMTCNSKISCISW  | 377 |
| Rat     | FTRYNSVRPLATLSYASDLYNGSSIVSIEFDRDCDYFAIAGVTKKIKVVEYDVTIQDAVDIHYPENEMTCNSKISCISW  | 480 |
| Mouse   | FTRYNSVRPLATLSYASDLYNGSSIVSIEFDRDCDYFAIAGVTKKIKVVEYDVTIQDAVDIHYPENEMTCNSKISCISW  | 480 |
|         |                                                                                  |     |
| Human   | SSYHKNLLASSDYEGTVILWDGFTGQRSKVYQEHEKRCWSVDFNLMDPKLLASGSDDAKVKLWSTNLDNSVASIEAKANV | 558 |
| Gorilla | SSYHKNLLASSDYEGTVILWDGFTGQRSKVYQEHEKRCWSVDFNLMDPKLLASGSDDAKVKLWSTNLDNSVASIEAKANV | 558 |
| Pig     | SSYHKNLLASSDYEGTVILWDGFTGQRSKVYQEHEKRCWSVDFNLMDPKLLASGSDDAKVKLWSTNLDNSVASIEAKANV | 557 |
| Rat     | SSYHKNLLASSDYEGTVILWDGFTGQRSKVYQEHEKRCWSVDFNLMDPKLLASGSDDAKVKLWSTNLDNSVASIEAKANV | 560 |
| Mouse   | SSYHKNLLASSDYEGTVILWDGFTGQRSKVYQEHEKRCWSVDFNLMDPKLLASGSDDAKVKLWSTNLDNSVASIEAKANV | 560 |
|         |                                                                                  |     |
| Human   | CCVKFSPSSRYHLAFGCADHCVHYDLRNTKQPIMVFKGHRKAVSYAKFVSGEEIVSASTDSQLKLWNVGKPYCLRSFKG  | 638 |
| Gorilla | CCVKFSPSSRYHLAFGCADHCVHYDLRNTKQPIMVFKGHRKAVSYAKFVSGEEIVSASTDSQLKLWNVGKPYCLRSFKG  | 638 |
| Pig     | CCVKFSPSSRYHLAFGCADHCVHYDLRNTKQPIMVFKGHRKAVSYAKFVSGEEIVSASTDSQLKLWNVGKPYCLRSFKG  | 637 |
| Rat     | CCVKFSPSSRYHLAFGCADHCVHYDLRNTKQPIMVFKGHRKAVSYAKFVSGEEIVSASTDSQLKLWNVGKPYCLRSFKG  | 640 |
| Mouse   | CCVKFSPSSRYHLAFGCADHCVHYDLRNTKQPIMVFKGHRKAVSYAKFVSGEEIVSASTDSQLKLWNVGKPYCLRSFKG  | 640 |
|         |                                                                                  |     |
| Human   | HINEKNFVGLASNGDYIACGSENNSLYLYYKGLSKTLLTFKFDTVKSVLDKDRKEDDTNEFVSAVCWRALPDGESNVLIA | 718 |
| Gorilla | HINEKNFVGLASNGDYIACGSENNSLYLYYKGLSKTLLTFKFDTVKSVLDKDRKEDDTNEFVSAVCWRALPDGESNVLIA | 718 |
| Pig     | HINEKNFVGLASNGDYIACGSENNSLYLYYKGLSKTLLTFKFDTVKSVLDKDRKEDDTNEFVSAVCWRALPDGESNVLIA | 717 |
| Rat     | HINEKNFVGLASNGDYIACGSENNSLYLYYKGLSKTLLTFKFDTVKSVLDKDRKEDDTNEFVSAVCWRALSDGESNVLIA | 720 |
| Mouse   | HINEKNFVGLASNGDYIACGSENNSLYLYYKGLSKTLLTFKFDTVKSVLDKDRKEDDTNEFVSAVCWRALSDGESNVLIA | 720 |
|         |                                                                                  |     |
| Human   | ANSQGTIKVLELV                                                                    | 731 |
| Gorilla | ANSQGTIKVLELV                                                                    | 731 |
| Pig     | ANSQGTIKVLELV                                                                    | 730 |
| Rat     | ANSQGTIKVLELV                                                                    | 733 |
| Mouse   | ANSQGTIKVLELV                                                                    | 733 |

Supplementary Figure S5. Alignment of COP1 protein sequence across species. Highlighted in Yellow are the D/E1 and D/E2 motifs.
